# Supplementary material for: Culturable Heavy Metal-Resistant and Plant Growth Promoting Bacteria in V-Ti Magnetite Mine Tailing Soil from Panzhihua, China
Source: PubMed Central journal article supplement (PMC4154735; doi:10.1371/journal.pone.0106618), 2014-09-04
Supplement: pone.0106618.s002.pdf [file pone.0106618.s002.pdf]

**Table S1.** IAA, Siderophore production and preliminary BOX-A1R PCR identification of V-Ti magnetite mine tailing soil isolates, and similarity analysis of 16S rRNA sequence for 91 selected strains.

| Family             | Strain name | IAA ( $\mu\text{g ml}^{-1}$ ) | Siderophore ( $\mu\text{g ml}^{-1}$ ) | BOX-A1R Group | 16S rRNA Length (bp) | 16S rRNA GenBank NO. | 16S rRNA blast analysis     |             |                |
|--------------------|-------------|-------------------------------|---------------------------------------|---------------|----------------------|----------------------|-----------------------------|-------------|----------------|
|                    |             |                               |                                       |               |                      |                      | Similar Genus               | GenBank NO. | Similarity (%) |
| <i>Bacillaceae</i> | KT74        | 10.04±4.42                    | 17.75±1.22                            | Group I       | 1429                 | KJ733976             | <i>Bacillus subtilis</i>    | JQ973708.1  | 99%            |
|                    | KT125       | 15.71±4.56                    | 0                                     | Group I       | 1432                 | KJ734023             | <i>Bacillus subtilis</i>    | EF656456.1  | 97%            |
|                    | KT47        | 0                             | 0                                     | Group I       | 1399                 | KJ733992             | <i>Bacillus subtilis</i>    | KF649246.1  | 99%            |
|                    | KT6         | 0                             | 0                                     | Group I       | 1423                 | KJ733987             | <i>Bacillus subtilis</i>    | KF381492.1  | 99%            |
|                    | KT116       | 55.82±3.87                    | 82.08±12.62                           | Group I       | 1431                 | KJ733964             | <i>Bacillus subtilis</i>    | KC456632.1  | 99%            |
|                    | KT66        | 8.65±2.37                     | 14.92±1.74                            | Group I       | 1429                 | KJ733962             | <i>Bacillus subtilis</i>    | KF381492.1  | 100%           |
|                    | KT135       | 18.80±0.82                    | 0                                     | Group I       | 1417                 | KJ733961             | <i>Bacillus subtilis</i>    | KJ081196.1  | 100%           |
|                    | KT92        | 39.14±4.03                    | 58.92±5.06                            | Group I       | 1456                 | KJ733960             | <i>Bacillus subtilis</i>    | JQ695930.1  | 99%            |
|                    | KT93        | 0                             | 167.67±32.76                          | Group I       | 1421                 | KJ733954             | <i>Bacillus subtilis</i>    | CP006881.1  | 100%           |
|                    | KT95        | 0                             | 0                                     | Group I       | -                    | -                    | -                           | -           | -              |
|                    | KT101       | 0                             | 0                                     | Group I       | 1430                 | KJ733953             | <i>Bacillus subtilis</i>    | KF818630.1  | 100%           |
|                    | KT98        | 0                             | 0                                     | Group I       | 1463                 | KJ733951             | <i>Bacillus subtilis</i>    | FJ263021.1  | 99%            |
|                    | KT53        | 0                             | 0                                     | Group I       | 1428                 | KJ733949             | <i>Bacillus subtilis</i>    | JN366715.1  | 99%            |
|                    | KT9         | 2.20±0.54                     | 0                                     | Group I       | 1428                 | KJ733946             | <i>Bacillus subtilis</i>    | JF322922.1  | 99%            |
|                    | KT12        | 0                             | 61.25±5.73                            | Group I       | 1408                 | KJ733945             | <i>Bacillus subtilis</i>    | KC441757.1  | 99%            |
|                    | KT8         | 9.15±0.40                     | 0                                     | Group I       | -                    | -                    | -                           | -           | -              |
|                    | KT85        | 38.50±7.54                    | 0                                     | Group I       | 1418                 | KJ733968             | <i>Bacillus subtilis</i>    | CP006881.1  | 99%            |
|                    | KT94        | 0                             | 0                                     | Group I       | 1421                 | KJ733972             | <i>Bacillus cereus</i>      | CP006881.1  | 100%           |
|                    | KT96        | 0                             | 0                                     | Group I       | -                    | -                    | -                           | -           | -              |
|                    | KT63        | 14.88±2.57                    | 0                                     | Group I       | 1416                 | KJ733981             | <i>Bacillus subtilis</i>    | KC441769.1  | 99%            |
|                    | KT59        | 15.94±2.78                    | 8.75±0.82                             | Group I       | -                    | -                    | -                           | -           | -              |
|                    | KT60        | 8.00±2.53                     | 0                                     | Group I       | -                    | -                    | -                           | -           | -              |
|                    | KT65        | 0                             | 15.00±2.67                            | Group I       | -                    | -                    | -                           | -           | -              |
|                    | KT23        | 34.28±4.43                    | 0                                     | Group I       | 1407                 | KJ733982             | <i>Bacillus subtilis</i>    | HQ418833.1  | 99%            |
|                    | KT83        | 2.16±0.12                     | 0                                     | Group I       | 1430                 | KJ733985             | <i>Bacillus subtilis</i>    | HQ166109.1  | 100%           |
|                    | KT64        | 3.26±0.36                     | 0                                     | Group I       | 1428                 | KJ733995             | <i>Bacillus subtilis</i>    | KC441757.1  | 100%           |
|                    | KT100       | 0                             | 0                                     | Group I       | 1431                 | KJ734000             | <i>Bacillus subtilis</i>    | KF001839.1  | 100%           |
|                    | KT105       | 0                             | 0                                     | Group I       | 1460                 | KJ734002             | <i>Bacillus subtilis</i>    | GU272021.1  | 99%            |
|                    | KT71        | 0                             | 0                                     | Group I       | 1421                 | KJ734012             | <i>Bacillus tequilensis</i> | KC172031.1  | 100%           |
|                    | KT58        | 7.17±1.45                     | 0                                     | Group I       | -                    | -                    | -                           | -           | -              |

|       |            |             |         |      |          |                               |            |      |
|-------|------------|-------------|---------|------|----------|-------------------------------|------------|------|
| KT10  | 29.13±3.11 | 0           | Group I | 1454 | KJ733947 | <i>Bacillus tequilensis</i>   | JF411314.1 | 99%  |
| KT17  | 36.05±2.73 | 0           | Group I | -    | -        | -                             | -          | -    |
| KT86  | 0          | 0           | Group I | -    | -        | -                             | -          | -    |
| KT97  | 0          | 10.33±3.32  | Group I | -    | -        | -                             | -          | -    |
| KT99  | 0          | 0           | Group I | -    | -        | -                             | -          | -    |
| KT104 | 13.84±2.14 | 0           | Group I | -    | -        | -                             | -          | -    |
| KT123 | 0          | 0           | Group I | -    | -        | -                             | -          | -    |
| KT113 | 0          | 105.33±6.91 | Group I | 1419 | KJ733955 | <i>Bacillus subtilis</i>      | CP006881.1 | 100% |
| KT115 | 0          | 0           | Group I | -    | -        | -                             | -          | -    |
| KT103 | 10.41±1.70 | 19.17±1.83  | Group I | 1429 | KJ733958 | <i>Bacillus tequilensis</i>   | JF411247.1 | 100% |
| KT107 | 0          | 20.08±1.12  | Group I | 1430 | KJ733970 | <i>Bacillus tequilensis</i>   | JF411297.1 | 100% |
| KT52  | 0          | 9.08±2.06   | Group I | 1428 | KJ733993 | <i>Bacillus subtilis</i>      | GQ262728.1 | 100% |
| KT132 | 0          | 0           | Group I | 1423 | KJ733997 | <i>Bacillus tequilensis</i>   | JF411299.1 | 100% |
| KT122 | 0          | 0           | Group I | 1428 | KJ733979 | <i>Bacillus licheniformis</i> | KF535146.1 | 100% |
| KT70  | 0          | 0           | Group I | 1431 | KJ734004 | <i>Bacillus licheniformis</i> | JX027378.1 | 99%  |
| KT89  | 0          | 0           | Group I | 1459 | KJ733969 | <i>Bacillus licheniformis</i> | GQ470399.1 | 99%  |
| KT87  | 34.75±4.30 | 0           | Group I | -    | -        | -                             | -          | -    |
| KT88  | 29.69±2.12 | 0           | Group I | -    | -        | -                             | -          | -    |
| KT131 | 0          | 0           | Group I | 1409 | KJ734003 | <i>Bacillus licheniformis</i> | KC969075.1 | 99%  |
| KT1   | 11.63±2.26 | 13.67±1.03  | Group I | 1426 | KJ733935 | <i>Bacillus pumilus</i>       | KF933667.1 | 99%  |
| KT3   | 0          | 22.00±4.10  | Group I | -    | -        | -                             | -          | -    |
| KT120 | 0          | 10.75±1.47  | Group I | -    | -        | -                             | -          | -    |
| KT76  | 10.68±0.84 | 0           | Group I | 1421 | KJ733938 | <i>Bacillus pumilus</i>       | KF956587.1 | 100% |
| KT129 | 0          | 0           | Group I | 1429 | KJ733940 | <i>Bacillus pumilus</i>       | GU593626.1 | 99%  |
| KT133 | 0          | 0           | Group I | 1467 | KJ733944 | <i>Bacillus pumilus</i>       | KC692160.1 | 99%  |
| KT5   | 12.38±2.29 | 0           | Group I | -    | -        | -                             | -          | -    |
| KT102 | 0          | 0           | Group I | -    | -        | -                             | -          | -    |
| KT130 | 13.53±1.54 | 0           | Group I | -    | -        | -                             | -          | -    |
| KT54  | 0          | 0           | Group I | 1455 | KJ733950 | <i>Bacillus pumilus</i>       | KC953600.1 | 99%  |
| KT90  | 61.83±4.92 | 6.42±0.85   | Group I | 1419 | KJ733959 | <i>Bacillus pumilus</i>       | KC915229.1 | 100% |
| KT121 | 65.99±5.57 | 0           | Group I | 1430 | KJ733963 | <i>Bacillus pumilus</i>       | GU593626.1 | 99%  |
| KT4   | 0          | 0           | Group I | 1426 | KJ733984 | <i>Bacillus pumilus</i>       | EF091147.1 | 98%  |
| KT119 | 0          | 0           | Group I | 1427 | KJ733965 | <i>Bacillus pumilus</i>       | KF158229.1 | 99%  |
| KT72  | 32.47±3.31 | 9.33±1.50   | Group I | 1429 | KJ733996 | <i>Bacillus pumilus</i>       | KF158227.1 | 100% |
| KT117 | 5.85±2.29  | 0           | Group I | 1440 | KJ733956 | <i>Bacillus oleronius</i>     | JN366717.1 | 99%  |

|                          |       |            |            |          |      |          |                                 |            |      |
|--------------------------|-------|------------|------------|----------|------|----------|---------------------------------|------------|------|
|                          | KT110 | 0          | 0          | Group I  | 1420 | KJ733952 | <i>Bacillus cereus</i>          | KF601957.1 | 100% |
|                          | KT136 | 6.53±0.57  | 0          | Group I  | 1429 | KJ734001 | <i>Bacillus cereus</i>          | KF933614.1 | 100% |
|                          | KT18  | 16.44±3.26 | 0          | Group I  | 1428 | KJ734022 | <i>Bacillus cereus</i>          | KF500919.1 | 100% |
|                          | KT50  | 74.92±3.51 | 0          | Group I  | 1426 | KJ733975 | <i>Bacillus nealsonii</i>       | KF535131.1 | 99%  |
|                          | KT43  | 38.02±7.08 | 0          | Group I  | 1435 | KJ733999 | <i>Bacillus nealsonii</i>       | KC329823.1 | 99%  |
|                          | KT57  | 9.75±1.08  | 0          | Group I  | 1432 | KJ733966 | <i>Bacillus nealsonii</i>       | KF535131.1 | 99%  |
|                          | KT67  | 28.44±1.19 | 0          | Group I  | 1428 | KJ733936 | <i>Bacillus nealsonii</i>       | KF535131.1 | 100% |
|                          | KT81  | 19.79±3.31 | 0          | Group I  | 1397 | KJ733967 | <i>Bacillus aryabhatai</i>      | HG424432.1 | 100% |
|                          | KT55  | 48.10±5.32 | 0          | Group I  | 1457 | KJ733974 | <i>Bacillus aryabhatai</i>      | JF895478.1 | 99%  |
|                          | KT91  | 0          | 0          | Group I  | 1405 | KJ733948 | <i>Bacillus simplex</i>         | KF818647.1 | 99%  |
|                          | KT128 | 16.08±3.18 | 0          | Group I  | 1437 | KJ733994 | <i>Bacillus simplex</i>         | JF496504.1 | 99%  |
|                          | KT15  | 10.39±1.20 | 0          | Group I  | 1436 | KJ734005 | <i>Bacillus simplex</i>         | JF496323.1 | 99%  |
|                          | KT82  | 29.60±3.03 | 0          | Group I  | 1419 | KJ733983 | <i>Bacillus fusiformis</i>      | AB167231.1 | 99%  |
|                          | KT84  | 7.55±1.62  | 0          | Group I  | 1400 | KJ733989 | <i>Bacillus parabrevis</i>      | JF460744.1 | 99%  |
| <i>Paenibacillaceae</i>  | KT19  | 10.95±2.40 | 0          | Group I  | 1429 | KJ733988 | <i>Paenibacillus tundrae</i>    | KF054885.1 | 99%  |
| <i>Microbacteriaceae</i> | KT69  | 18.79±2.50 | 0          | Group I  | 1394 | KJ734025 | <i>Microbacterium aerolatum</i> | JN934389.1 | 99%  |
| <i>Caulobacteraceae</i>  | KT68  | 8.83±2.00  | 0          | Group II | 1332 | KJ734024 | <i>Brevundimonas bullata</i>    | EU977636.1 | 94%  |
|                          | KT14  | 8.82±2.51  | 0          | Group II | 1328 | KJ733980 | <i>Brevundimonas bullata</i>    | EU977700.1 | 99%  |
|                          | KT61  | 0          | 0          | Group II | 1334 | KJ734009 | <i>Brevundimonas bullata</i>    | EU977700.1 | 99%  |
| <i>Rhizobiaceae</i>      | KT78  | 69.03±3.85 | 0          | Group II | 1366 | KJ734008 | <i>Ochrobactrum intermedium</i> | AB840696.1 | 100% |
|                          | KT73  | 61.11±2.47 | 0          | Group II | -    | -        | -                               | -          | -    |
|                          | KT48  | 21.00±1.68 | 0          | Group II | 1358 | KJ734021 | <i>Ochrobactrum intermedium</i> | JX393005.1 | 99%  |
|                          | KT126 | 24.22±1.22 | 0          | Group II | 1359 | KJ733991 | <i>Ochrobactrum intermedium</i> | JX393005.1 | 100% |
|                          | KT77  | 71.23±5.07 | 14.58±3.98 | Group II | 1355 | KJ733971 | <i>Ochrobactrum intermedium</i> | JX393005.1 | 100% |
|                          | KT49  | 68.13±3.59 | 0          | Group II | 1391 | KJ733957 | <i>Ochrobactrum intermedium</i> | KF381492.1 | 100% |
|                          | KT118 | 0          | 13.42±3.78 | Group II | -    | -        | -                               | -          | -    |
|                          | KT124 | 13.82±2.10 | 0          | Group II | -    | -        | -                               | -          | -    |
|                          | KT134 | 0          | 0          | Group II | 1371 | KJ733942 | <i>Ochrobactrum intermedium</i> | JX393005.1 | 99%  |
|                          | KT51  | 68.97±5.47 | 0          | Group II | 1302 | KJ733941 | <i>Ochrobactrum intermedium</i> | AB840686.1 | 99%  |
|                          | KT79  | 26.86±4.14 | 0          | Group II | -    | -        | -                               | -          | -    |
|                          | KT75  | 42.41±6.66 | 0          | Group II | 1356 | KJ733937 | <i>Ochrobactrum intermedium</i> | JX393005.1 | 100% |
|                          | KT80  | 83.05±5.61 | 0          | Group II | -    | -        | -                               | -          | -    |
|                          | KT127 | 8.36±4.90  | 0          | Group II | 1362 | KJ733986 | <i>Sinorhizobium adhaerens</i>  | AJ420773.1 | 99%  |
|                          | KT108 | 8.68±3.32  | 0          | Group II | 1389 | KJ734006 | <i>Rhizobium sp.</i>            | HM151908.1 | 99%  |
|                          | KT109 | 0          | 0          | Group II | -    | -        | -                               | -          | -    |

|                           |       |            |            |          |      |          |                                    |            |      |
|---------------------------|-------|------------|------------|----------|------|----------|------------------------------------|------------|------|
|                           | KT35  | 41.15±0.86 | 0          | Group II | 1391 | KJ734011 | <i>Rhizobium sp.</i>               | KF263563.1 | 99%  |
|                           | KT21  | 28.16±2.48 | 28.58±2.58 | Group II | 1363 | KJ734013 | <i>Rhizobium sp.</i>               | HM151908.1 | 99%  |
|                           | KT20  | 36.11±1.26 | 0          | Group II | -    | -        | -                                  | -          | -    |
|                           | KT22  | 36.23±5.39 | 0          | Group II | -    | -        | -                                  | -          | -    |
|                           | KT25  | 44.68±3.96 | 0          | Group II | -    | -        | -                                  | -          | -    |
|                           | KT26  | 52.22±4.45 | 24.58±3.12 | Group II | -    | -        | -                                  | -          | -    |
|                           | KT27  | 29.95±0.45 | 34.75±4.64 | Group II | -    | -        | -                                  | -          | -    |
|                           | KT28  | 41.43±2.92 | 0          | Group II | -    | -        | -                                  | -          | -    |
|                           | KT29  | 29.81±3.22 | 46.92±4.48 | Group II | -    | -        | -                                  | -          | -    |
|                           | KT30  | 46.11±0.76 | 0          | Group II | -    | -        | -                                  | -          | -    |
|                           | KT31  | 29.69±3.72 | 0          | Group II | -    | -        | -                                  | -          | -    |
|                           | KT32  | 38.52±5.27 | 0          | Group II | -    | -        | -                                  | -          | -    |
|                           | KT33  | 36.11±5.45 | 0          | Group II | -    | -        | -                                  | -          | -    |
|                           | KT36  | 18.75±1.94 | 0          | Group II | -    | -        | -                                  | -          | -    |
|                           | KT37  | 43.30±3.38 | 0          | Group II | -    | -        | -                                  | -          | -    |
|                           | KT40  | 53.38±4.10 | 0          | Group II | -    | -        | -                                  | -          | -    |
|                           | KT42  | 41.89±7.81 | 0          | Group II | -    | -        | -                                  | -          | -    |
|                           | KT39  | 43.16±5.21 | 0          | Group II | 1399 | KJ734014 | <i>Rhizobium sp.</i>               | KF263563.1 | 99%  |
|                           | KT41  | 37.54±1.45 | 0          | Group II | 1365 | KJ734015 | <i>Rhizobium sp.</i>               | KF008226.1 | 100% |
|                           | KT24  | 75.82±3.62 | 0          | Group II | 1394 | KJ734017 | <i>Rhizobium sp.</i>               | HM756197.1 | 100% |
|                           | KT62  | 44.47±2.50 | 0          | Group II | -    | -        | -                                  | -          | -    |
|                           | KT34  | 47.71±3.52 | 37.75±0.89 | Group II | 1367 | KJ734019 | <i>Rhizobium sp.</i>               | KF263563.1 | 99%  |
|                           | KT38  | 37.05±3.93 | 0          | Group II | 1392 | KJ734020 | <i>Rhizobium sp.</i>               | HM151908.1 | 100% |
|                           | KT45  | 38.15±3.47 | 0          | Group II | 1365 | KJ734016 | <i>Rhizobium sp.</i>               | KF870446.1 | 9-9% |
|                           | KT44  | 46.82±3.27 | 0          | Group II | -    | -        | -                                  | -          | -    |
|                           | KT16  | 23.99±3.10 | 33.83±1.20 | Group II | 1357 | KJ734007 | <i>Rhizobium sp.</i>               | HG518323.1 | 98%  |
|                           | KT56  | 54.47±4.29 | 0          | Group II | 1357 | KJ734018 | <i>Rhizobium sp.</i>               | KF263563.1 | 97%  |
| <i>Alcaligenaceae</i>     | KT106 | 0          | 0          | Group II | 1407 | KJ733990 | <i>Advenella incenata</i>          | KF844056.1 | 99%  |
|                           | KT11  | 4.63±2.27  | 22.42±5.00 | Group II | 1397 | KJ733939 | <i>Advenella incenata</i>          | KF844056.1 | 99%  |
|                           | KT2   | 12.04±1.25 | 0          | Group II | 1408 | KJ733943 | <i>Advenella incenata</i>          | KF844056.1 | 100% |
| <i>Pseudomonadaceae</i>   | KT111 | 0          | 0          | Group II | 1414 | KJ733977 | <i>Pseudomonas plecoglossicida</i> | EU594553.1 | 99%  |
| <i>Moraxellaceae</i>      | KT46  | 19.03±2.96 | 5.50±0.62  | Group II | 1412 | KJ733973 | <i>Acinetobacter johnsonii</i>     | KC895498.1 | 99%  |
| <i>Enterobacteriaceae</i> | KT112 | 0          | 76.58±6.61 | Group II | 1414 | KJ733978 | <i>Pantoea dispersa</i>            | GQ200831.1 | 99%  |
|                           | KT114 | 5.36±0.96  | 0          | Group II | -    | -        | -                                  | -          | -    |
|                           | KT7   | 79.02±9.35 | 0          | Group II | 1360 | KJ734010 | <i>Providencia rettgeri</i>        | KF923809.1 | 99%  |

|                            |      |   |   |          |      |          |                                      |            |     |
|----------------------------|------|---|---|----------|------|----------|--------------------------------------|------------|-----|
| <i>Sphingobacteriaceae</i> | KT13 | 0 | 0 | Group II | 1408 | KJ733998 | <i>Sphingobacterium thalpophilum</i> | HM771694.1 | 99% |
|----------------------------|------|---|---|----------|------|----------|--------------------------------------|------------|-----|

The isolates with no accession number were identified by BOX-AIR PCR only.
